# Supplementary material for: Bistability of a coupled Aurora B kinase-phosphatase system in cell division
Source: eLife journal article supplement (doi:10.7554/elife.10644), 2016-01-14
Supplement: supp [file elife-10644-supp-v1.zip]

**A**

gene cassette for Aurora B recruitment

proteins expressed

a single copy of FKBP is shown for clarity, but in all experiments a tandem trimer FKBP (Mis12-GFP-FKBPx3) was used

rapamycin-induced dimerization

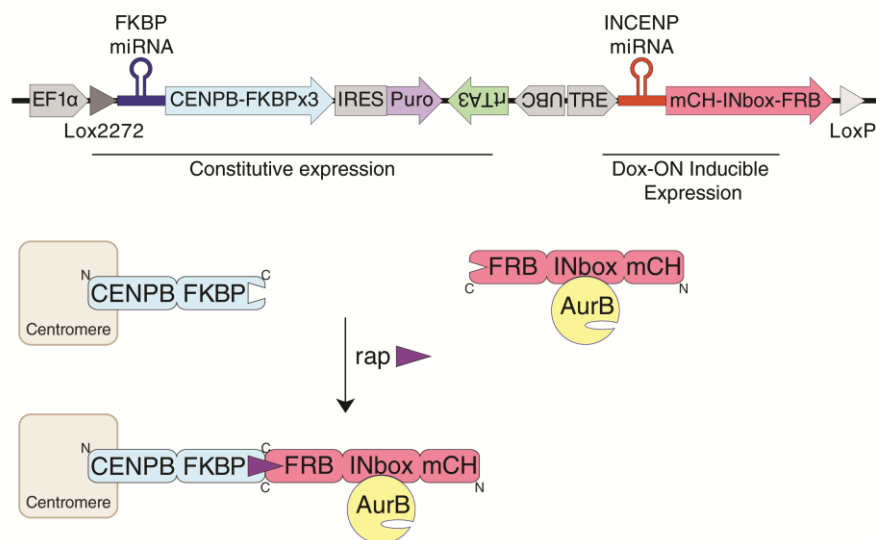

**B**

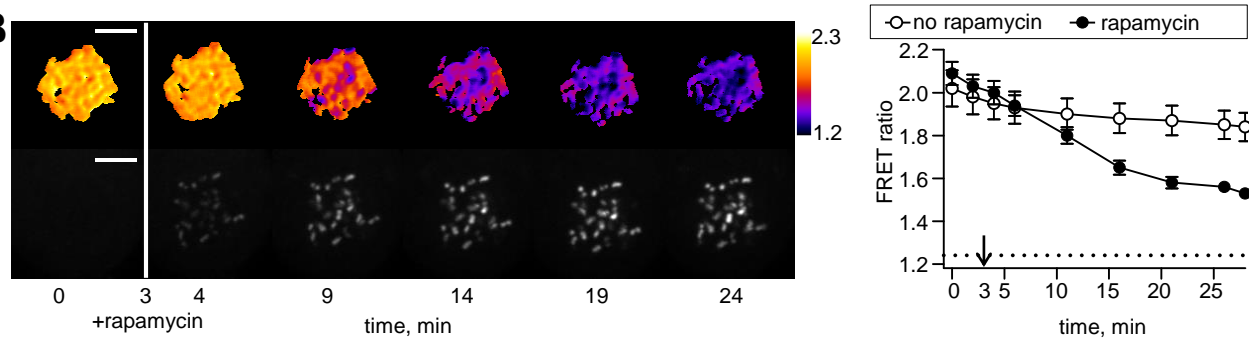

Figure 1 - figure supplement 1
