# Supplementary material for: Bistability of a coupled Aurora B kinase-phosphatase system in cell division
Source: eLife journal article supplement (doi:10.7554/elife.10644), 2016-01-14
Supplement: supp [file elife-10644-supp-v1.zip]

Archive with 8 entries (8 files):
- elife_poa_e10644_Figure_1_figure_supplement_1.pdf
- elife_poa_e10644_Figure_2_figure_supplement_2.pdf
- elife_poa_e10644_Figure2_figure_supplement_1.pdf
- elife_poa_e10644_Figure_5_figure_supplement_1.pdf
- elife_poa_e10644_Figure_3_figure_supplement_1.pdf
- elife_poa_e10644_Figure_6_figure_supplement_1.pdf
- elife_poa_e10644_Figure_2_figure_supplement_3.pdf
- elife_poa_e10644_Figure_8_figure_supplement_1.pdf
