# Supplementary figures and images for: Bistability of a coupled Aurora B kinase-phosphatase system in cell division
Source: eLife journal article supplement (doi:10.7554/elife.10644), 2016-01-14

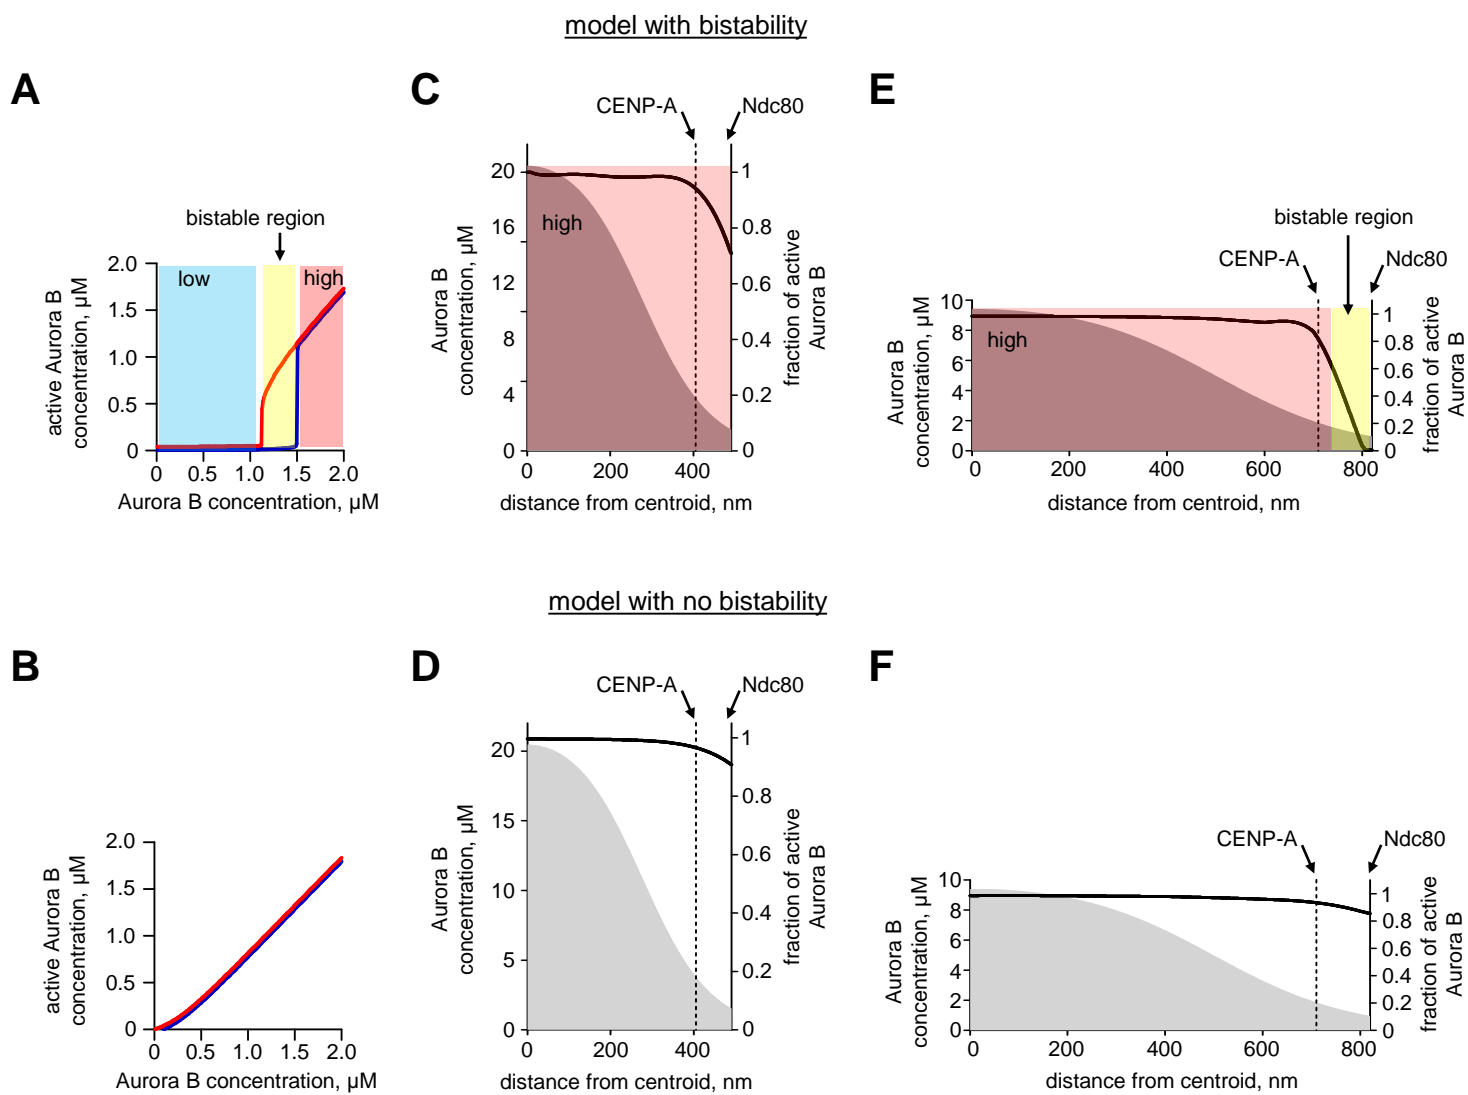

Figure 8 - figure supplement 1

Supplement: supp [file elife-10644-supp-v1.zip]

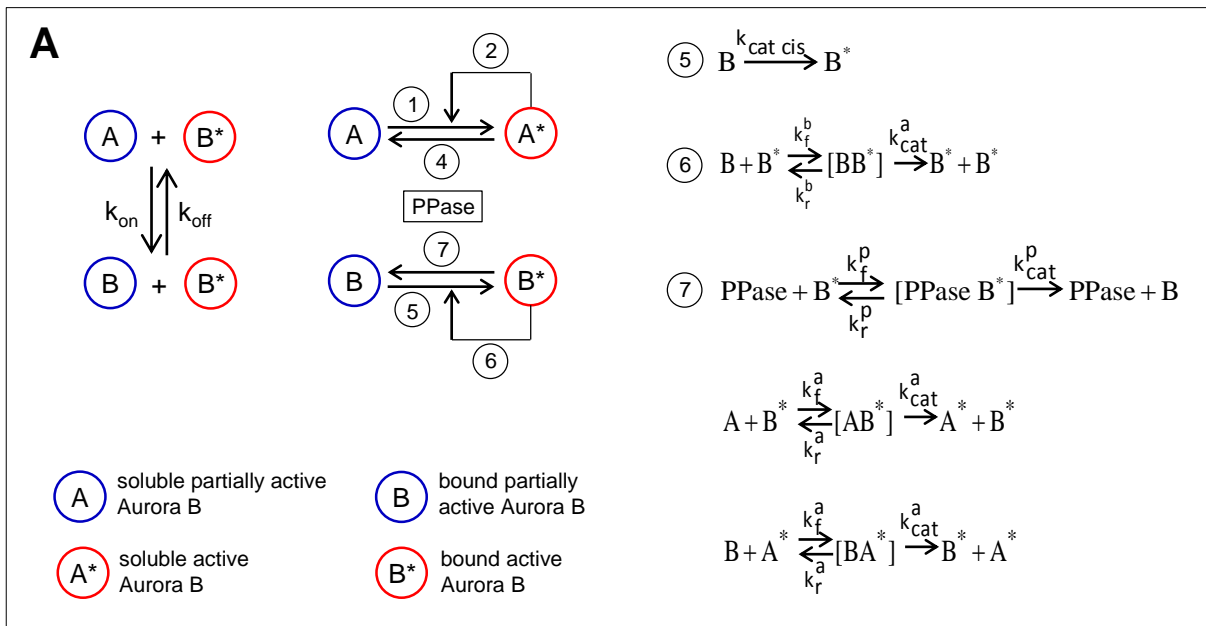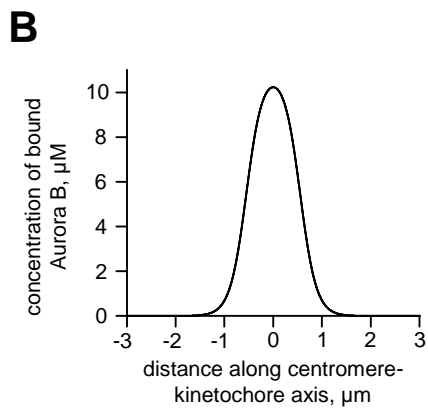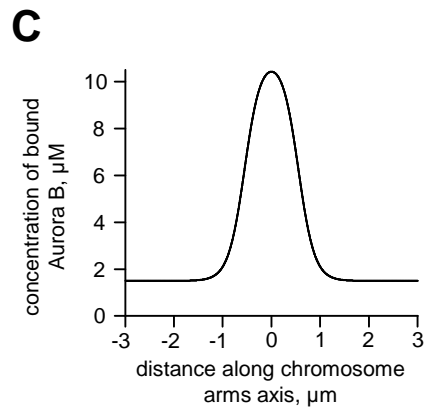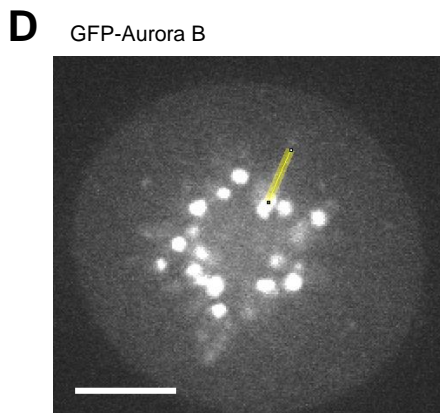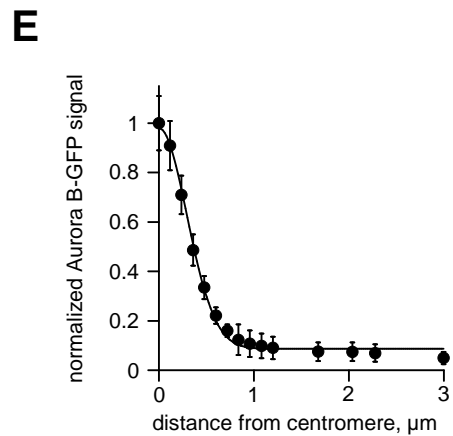

Figure 6 – figure supplement 1

Supplement: supp [file elife-10644-supp-v1.zip]

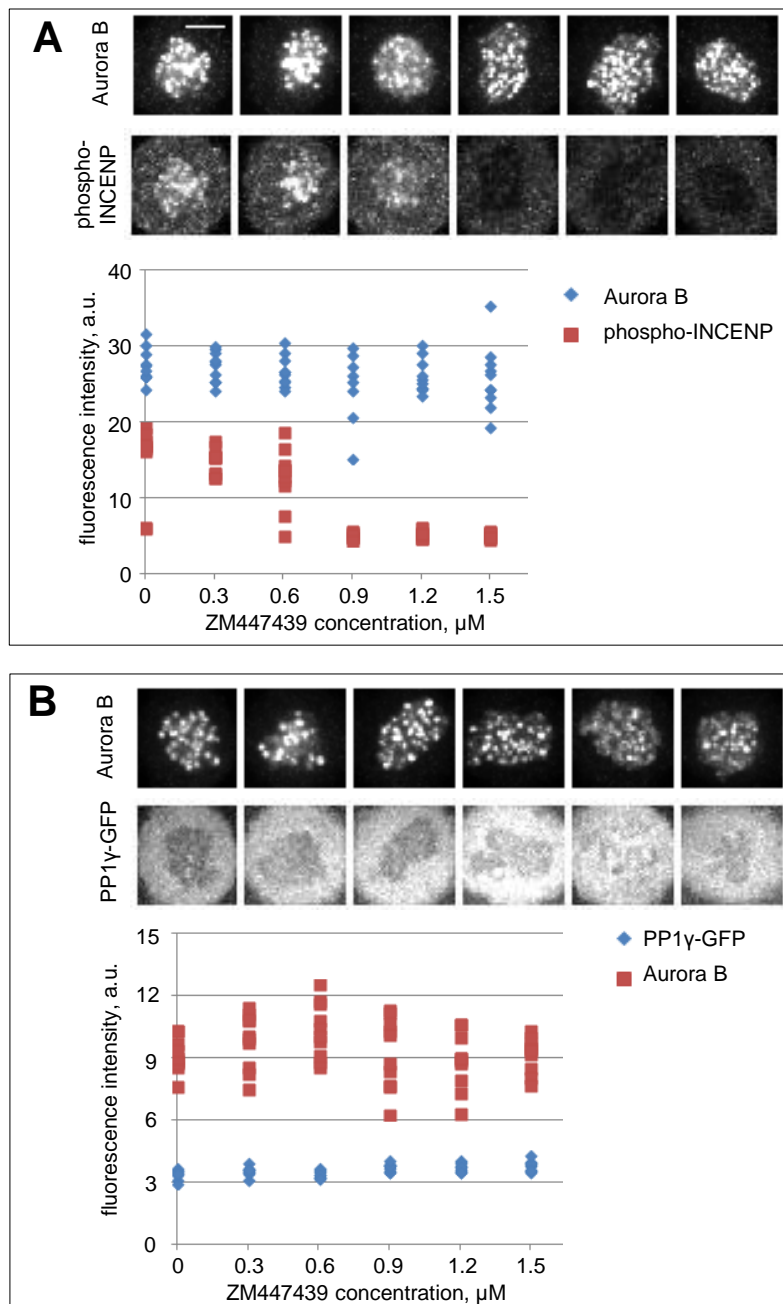

Figure 5 - figure supplement 1

Supplement: supp [file elife-10644-supp-v1.zip]

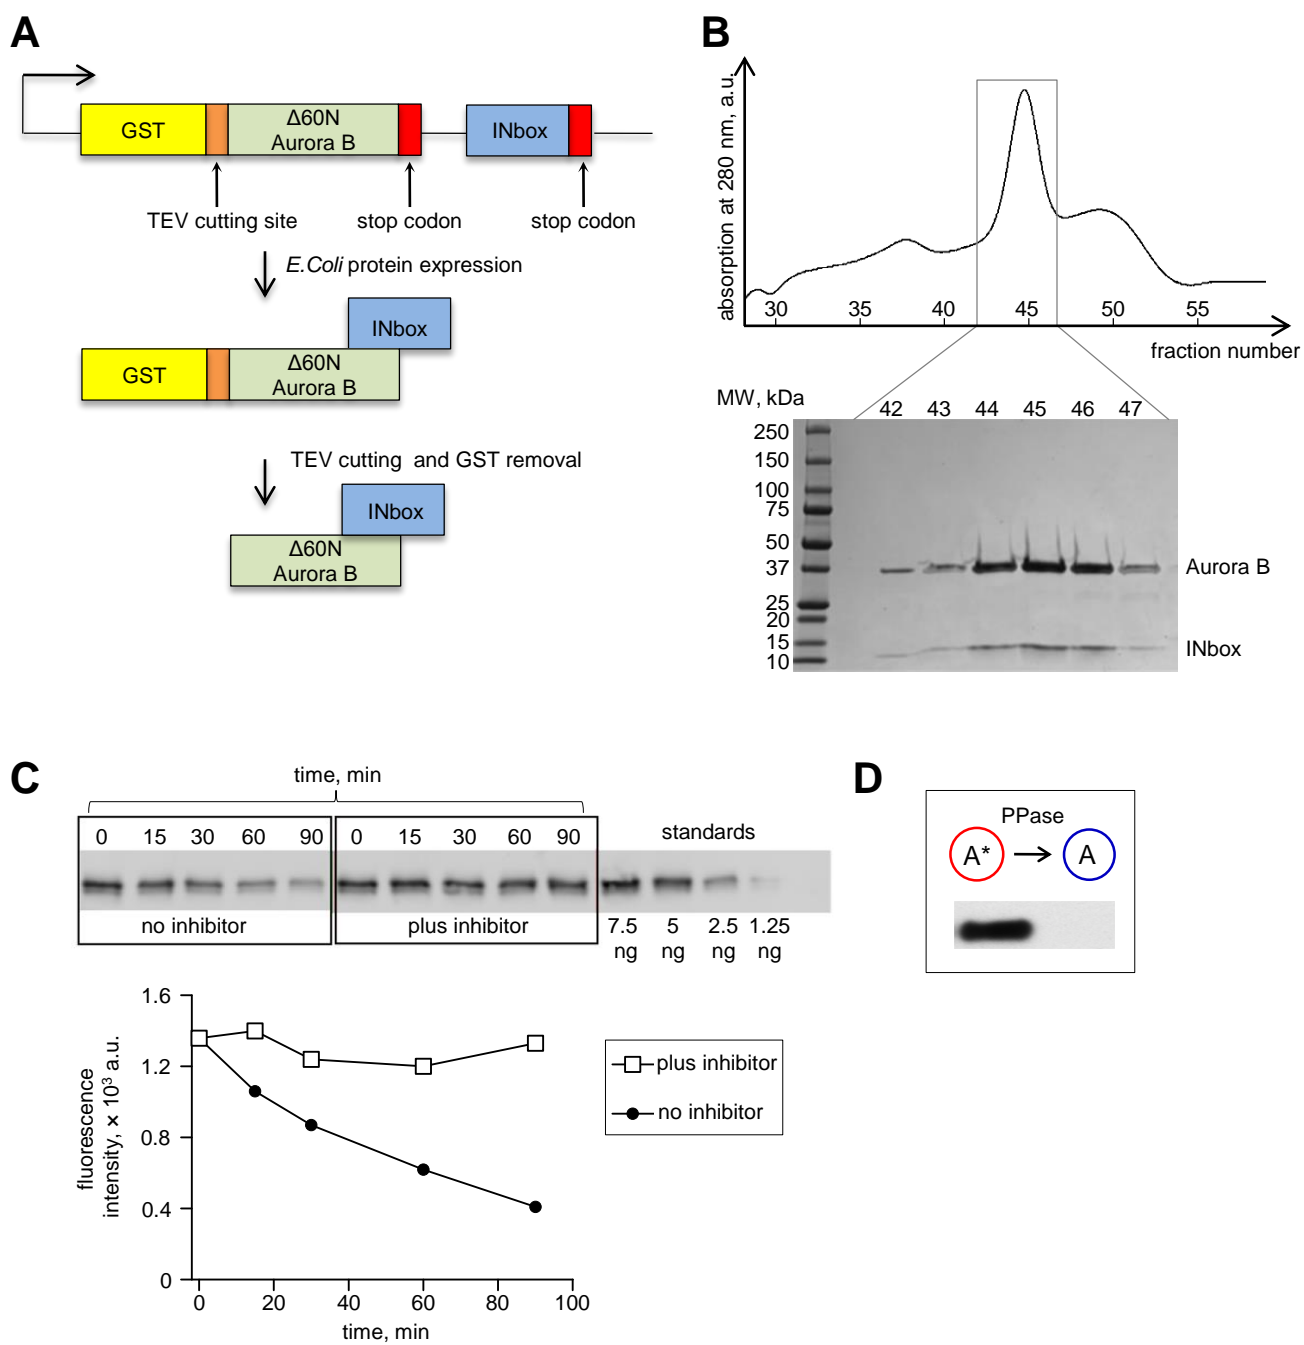

Figure 2 - figure supplement 1

Supplement: supp [file elife-10644-supp-v1.zip]

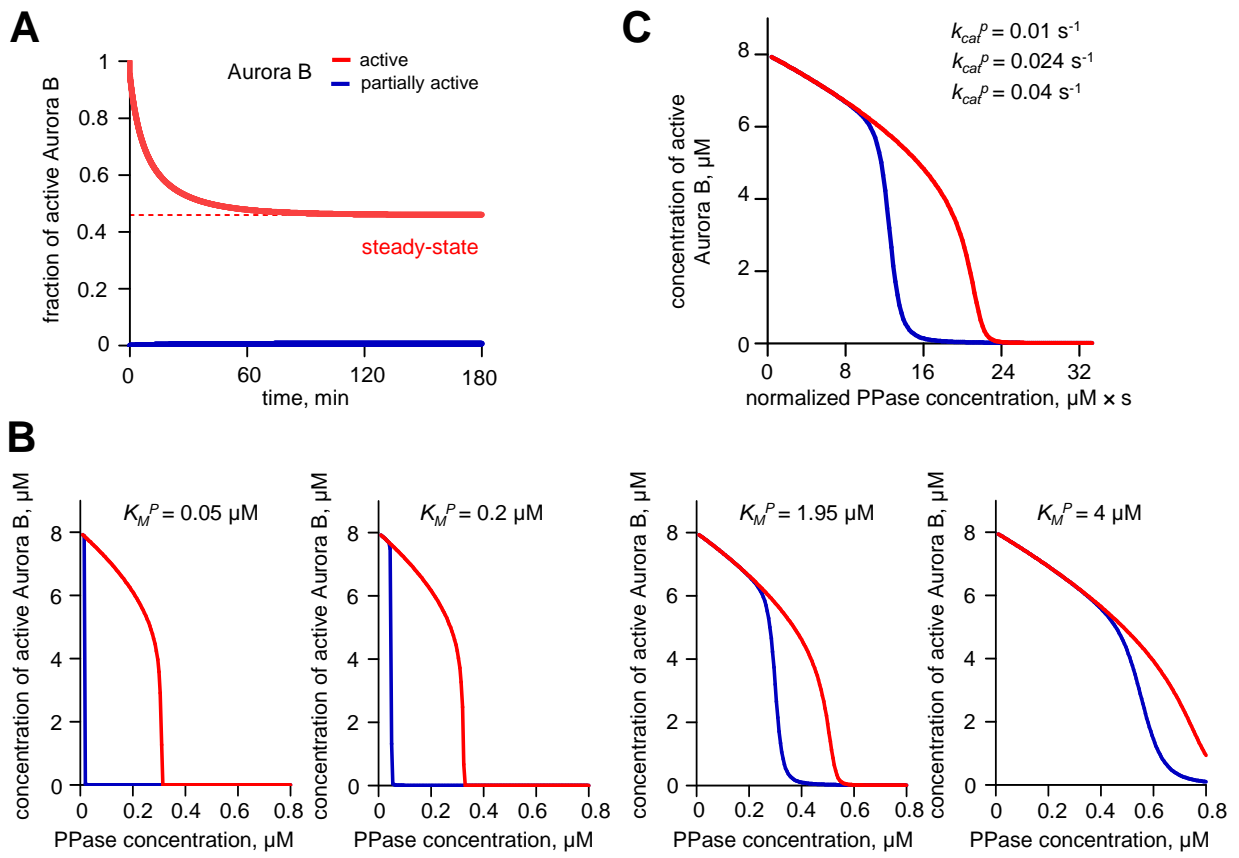

Figure 3 - figure supplement 1

Supplement: supp [file elife-10644-supp-v1.zip]

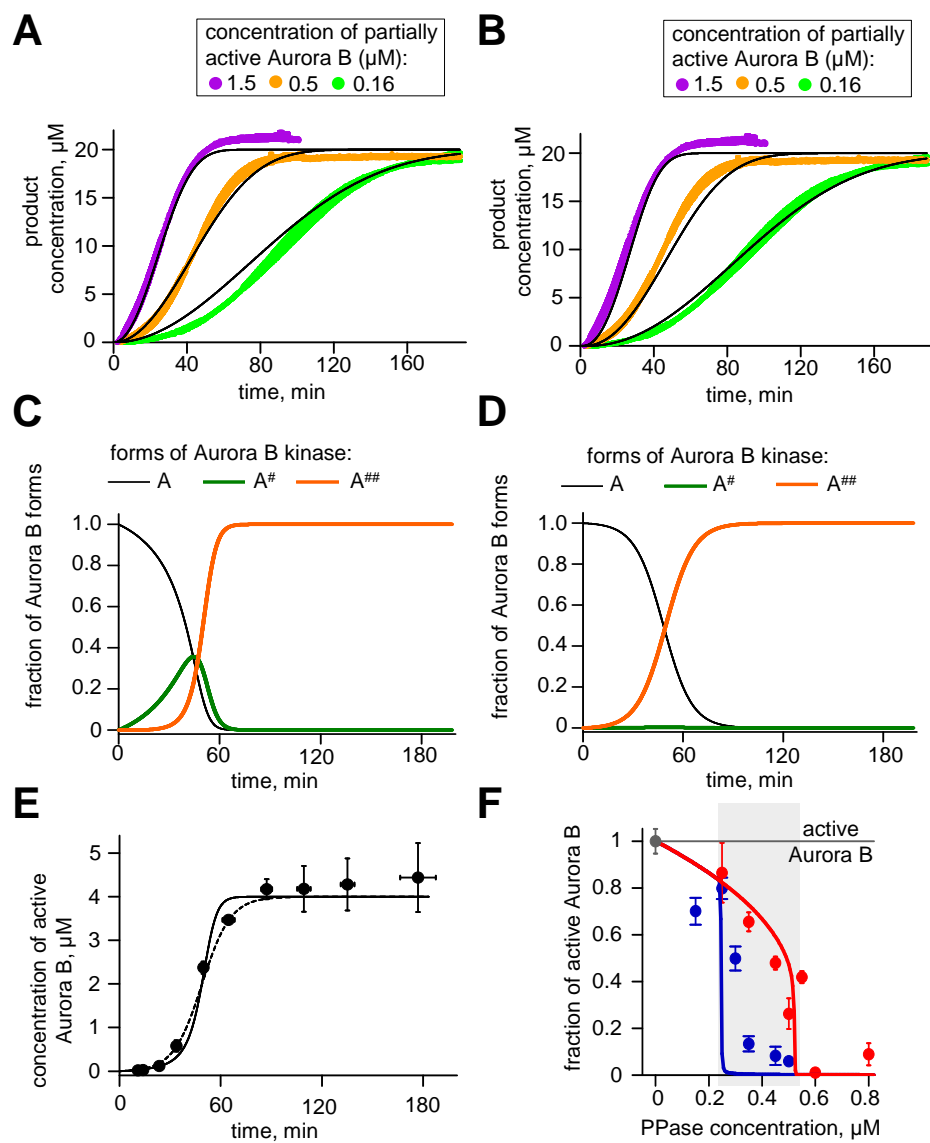

Figure 2 – figure supplement 3

Supplement: supp [file elife-10644-supp-v1.zip]

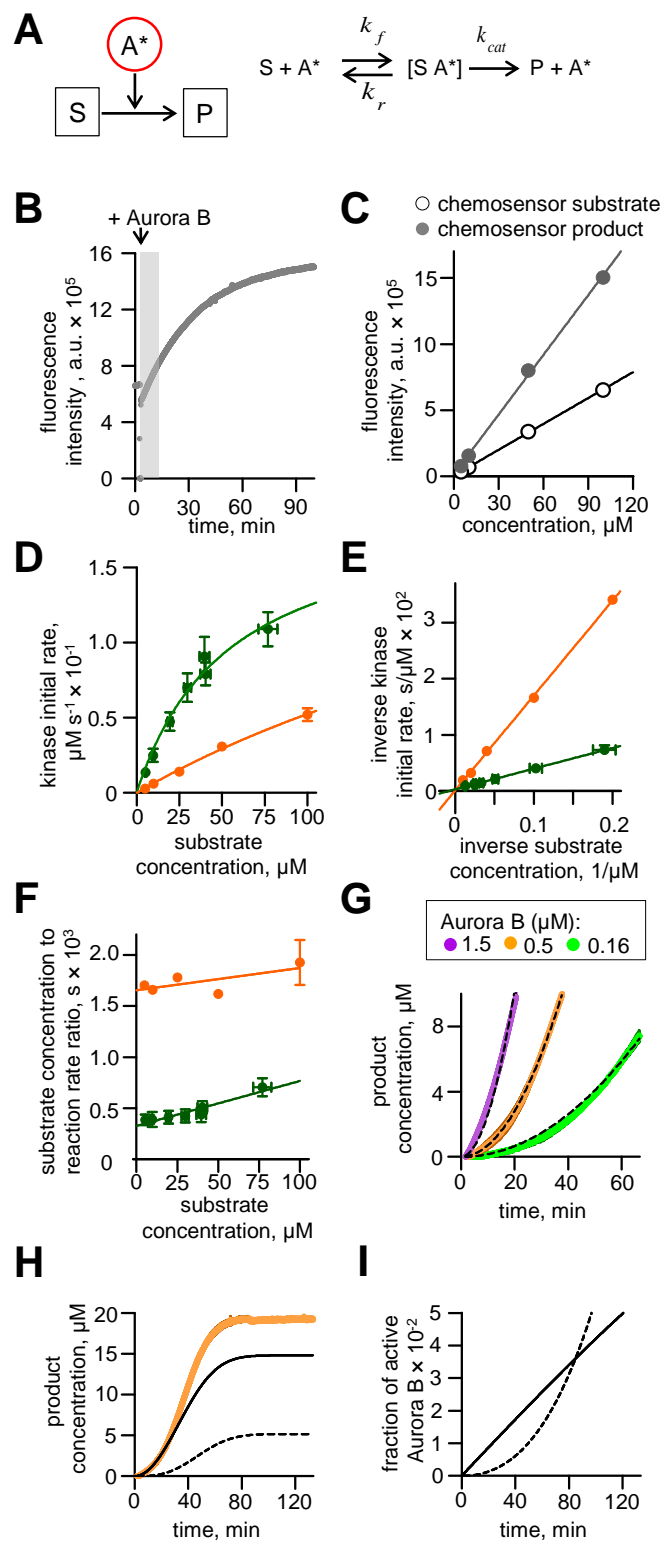

Figure 2 - figure supplement 2

Supplement: supp [file elife-10644-supp-v1.zip]
